# Supplementary material
Source: PubMed Central journal article supplement (PMC4399064)
Supplement: IAI.03095-14_zii999091210so1.pdf [file IAI.03095-14_zii999091210so1.pdf]

### Supplementary Table S1

Endotoxin levels in the purified recombinant PvTRAGs preparations.

| Recombinant Proteins | EU/100 µg |
|----------------------|-----------|
| PvTRAg37.4           | 5.72      |
| PvTRAg38.7           | 5.91      |
| PvTRAg35.2a          | 5.24      |
| PvTRAg35.7           | 2.1       |
| PvTRAg38.8           | 6.33      |
| PvTRAg40.8           | 7.12      |
| PvTRAg33.6           | 4.5       |
| PvTRAg34.9           | 5.81      |
| PvTRAg56.2           | 5.55      |
| PvTRAg309            | 1.64      |
| PvTRAg38.5           | 6.42      |
| PvTRAg39.8a          | 1.86      |
| PvTRAg42.9a          | 6.31      |
| PvTRAg157            | 7.5       |
| PvTRAg73.4           | 2.47      |
| PvTRAg36.6           | 4.69      |
| PvTRAg36             | 5.77      |
| PvTRAg99.6           | 2.27      |
| PvTRAg34             | 4.06      |
| PvTRAg36.7           | 4.32      |
| PvTRAg26.3           | 7.38      |

EU, Endotoxin Unit
