# Supplementary material
Source: PubMed Central journal article supplement (PMC4399064)
Supplement: IAI.03095-14_zii999091210so2.pdf [file IAI.03095-14_zii999091210so2.pdf]

Table S2. Relative levels of immune responses against different PvTRAGs

| S. No. | Antigens    | MFI   | Cytokines        |                                     |                  |                                     |                  |                                     |                  |                                     | IFN- $\gamma$ /IL-4 | Seropositivity (%) |
|--------|-------------|-------|------------------|-------------------------------------|------------------|-------------------------------------|------------------|-------------------------------------|------------------|-------------------------------------|---------------------|--------------------|
|        |             |       | IFN- $\gamma$    |                                     | IL-2             |                                     | IL-4             |                                     | IL-10            |                                     |                     |                    |
|        |             |       | Healthy controls | <i>P. vivax</i> exposed individuals |                     |                    |
| 1      | PvTRAg      | 9.4   | 0.95 $\pm$ 0.15  | 2.66 $\pm$ 0.63*                    | 1.27 $\pm$ 0.30  | 2.55 $\pm$ 0.39*                    | 0.92 $\pm$ 0.30  | 3.38 $\pm$ 0.55*                    | 0.22 $\pm$ 0.02  | 0.59 $\pm$ 0.14*                    | 0.78                | 84.84              |
| 2      | PvTRAg69.4  | 9.74  | 1.02 $\pm$ 0.33  | 2.25 $\pm$ 0.29*                    | 1.95 $\pm$ 0.20  | 2.81 $\pm$ 0.48                     | 1.35 $\pm$ 0.27  | 2.88 $\pm$ 0.22*                    | 0.55 $\pm$ 0.26  | 0.87 $\pm$ 0.19                     | 0.78                | 100                |
| 3      | PvTRAg40    | 10.53 | 0.85 $\pm$ 0.13  | 2.36 $\pm$ 0.41*                    | 1 $\pm$ 0.20     | 2.86 $\pm$ 0.63*                    | 1.07 $\pm$ 0.27  | 3.85 $\pm$ 0.71*                    | 0.22 $\pm$ 0.09  | 0.66 $\pm$ 0.20                     | 0.61                | 93.93              |
| 4      | PvTRAg38    | 7.83  | 0.75 $\pm$ 0.17  | 2.4 $\pm$ 0.41*                     | 1.62 $\pm$ 0.44  | 2.92 $\pm$ 0.39                     | 0.92 $\pm$ 0.39  | 2.97 $\pm$ 0.47*                    | 0.6 $\pm$ 0.43   | 0.86 $\pm$ 0.23                     | 0.8                 | 81.81              |
| 5      | PvTARAe55   | 8.78  | 1.02 $\pm$ 0.16  | 2.01 $\pm$ 0.27*                    | 1.12 $\pm$ 0.21  | 2.78 $\pm$ 0.68*                    | 1.25 $\pm$ 0.29  | 2.95 $\pm$ 0.37*                    | 0.22 $\pm$ 0.06  | 0.97 $\pm$ 0.29*                    | 0.68                | 93.93              |
| 6      | PvTRAg80.6  | 8.22  | 0.80 $\pm$ 0.17  | 1.88 $\pm$ 0.29*                    | 1.47 $\pm$ 0.38  | 2.08 $\pm$ 0.41*                    | 1 $\pm$ 0.26     | 2.29 $\pm$ 0.39*                    | 0.3 $\pm$ 0.07   | 0.91 $\pm$ 0.29                     | 0.64                | 93.93              |
| 7      | PvTRAg53.7  | 6.54  | 1.00 $\pm$ 0.12  | 2.32 $\pm$ 0.45*                    | 0.77 $\pm$ 0.27  | 2.3 $\pm$ 0.44                      | 1.62 $\pm$ 0.34  | 2.54 $\pm$ 0.44                     | 0.27 $\pm$ 0.11  | 0.71 $\pm$ 0.22                     | 0.91                | 96.96              |
| 8      | PvTRAg39.8  | 6.51  | 1.17 $\pm$ 0.09  | 2.45 $\pm$ 0.34*                    | 0.95 $\pm$ 0.22  | 2.75 $\pm$ 0.46*                    | 0.85 $\pm$ 0.23  | 2.94 $\pm$ 0.53*                    | 0.35 $\pm$ 0.17  | 0.84 $\pm$ 0.20                     | 0.83                | 87.87              |
| 9      | PvATRAg74   | 6.53  | 0.70 $\pm$ 0.14  | 2.47 $\pm$ 0.63*                    | 1.22 $\pm$ 0.21  | 3.12 $\pm$ 0.58                     | 1.47 $\pm$ 0.51  | 2.99 $\pm$ 0.53                     | 0.3 $\pm$ 0.04   | 0.89 $\pm$ 0.23*                    | 0.82                | 87.87              |
| 10     | PvTRAg43.1  | 6.55  | 0.90 $\pm$ 0.22  | 1.81 $\pm$ 0.29*                    | 0.97 $\pm$ 0.23  | 2.51 $\pm$ 0.21*                    | 1.12 $\pm$ 0.23  | 2.82 $\pm$ 0.47*                    | 0.25 $\pm$ 0.05  | 0.64 $\pm$ 0.15*                    | 0.64                | 93.93              |
| 11     | PvTRAg42.9  | 6.94  | 0.77 $\pm$ 0.21  | 1.62 $\pm$ 0.25*                    | 0.92 $\pm$ 0.21  | 2.74 $\pm$ 0.56*                    | 0.82 $\pm$ 0.22  | 2.29 $\pm$ 0.33*                    | 0.37 $\pm$ 0.20  | 0.87 $\pm$ 0.20                     | 0.7                 | 75.75              |
| 12     | PvTRAg39.9  | 6.97  | 0.90 $\pm$ 0.09  | 1.63 $\pm$ 0.22*                    | 1.32 $\pm$ 0.16  | 3.29 $\pm$ 0.93                     | 1.2 $\pm$ 0.17   | 2.21 $\pm$ 0.29                     | 0.52 $\pm$ 0.22  | 1.34 $\pm$ 0.46                     | 0.73                | 90.9               |
| 13     | PvTRAg32.4  | 6.45  | 0.67 $\pm$ 0.20  | 1.35 $\pm$ 0.26                     | 0.95 $\pm$ 0.06  | 1.57 $\pm$ 0.20                     | 0.97 $\pm$ 0.17  | 2.1 $\pm$ 0.41*                     | 0.27 $\pm$ 0.08  | 0.48 $\pm$ 0.09                     | 0.64                | 90.9               |
| 14     | PvTRAg35.2  | 8.8   | 0.85 $\pm$ 0.13  | 2.12 $\pm$ 0.37*                    | 0.95 $\pm$ 0.25  | 2.48 $\pm$ 0.44*                    | 1 $\pm$ 0.26     | 3.08 $\pm$ 0.44*                    | 0.35 $\pm$ 0.18  | 0.84 $\pm$ 0.24                     | 0.68                | 96.96              |
| 15     | PvTRAg33.5  | 8.38  | 0.70 $\pm$ 0.19  | 1.68 $\pm$ 0.43                     | 0.97 $\pm$ 0.21  | 1.94 $\pm$ 0.43                     | 1.32 $\pm$ 0.25  | 2.52 $\pm$ 0.58                     | 0.3 $\pm$ 0.13   | 0.55 $\pm$ 0.14                     | 0.66                | 100                |
| 16     | PvTRAg38.7  | 6.88  | 1.06 $\pm$ 0.08  | 2.06 $\pm$ 0.19*                    | 0.51 $\pm$ 0.10  | 3.03 $\pm$ 0.56*                    | 0.98 $\pm$ 0.19  | 2.35 $\pm$ 0.22*                    | 0.33 $\pm$ 0.09  | 1.19 $\pm$ 0.33*                    | 0.88                | 66.66              |
| 17     | PvTRAg35.2a | 5.54  | 0.78 $\pm$ 0.11  | 1.7 $\pm$ 0.26*                     | 0.87 $\pm$ 0.09  | 2.01 $\pm$ 0.20*                    | 0.84 $\pm$ 0.13  | 2.41 $\pm$ 0.3*                     | 0.22 $\pm$ 0.04  | 0.55 $\pm$ 0.08*                    | 0.7                 | 66.66              |
| 18     | PvTRAg35.7  | 6.16  | 0.84 $\pm$ 0.17  | 2.16 $\pm$ 0.21*                    | 0.93 $\pm$ 0.11  | 2.54 $\pm$ 0.32*                    | 0.98 $\pm$ 0.12  | 2.80 $\pm$ 0.30*                    | 0.41 $\pm$ 0.09  | 0.67 $\pm$ 0.18                     | 0.77                | 68.51              |
| 19     | PvTRAg38.8  | 6.54  | 0.97 $\pm$ 0.09  | 2.02 $\pm$ 0.18*                    | 0.88 $\pm$ 0.13  | 2.37 $\pm$ 0.28*                    | 1.27 $\pm$ 0.20  | 2.35 $\pm$ 0.24*                    | 0.33 $\pm$ 0.08  | 0.52 $\pm$ 0.08                     | 0.86                | 70.37              |
| 20     | PvTRAg40.8  | 6.11  | 0.82 $\pm$ 0.08  | 2.01 $\pm$ 0.30*                    | 1.17 $\pm$ 0.13  | 3.04 $\pm$ 0.53*                    | 0.7 $\pm$ 0.15   | 3 $\pm$ 0.43*                       | 0.25 $\pm$ 0.04  | 0.66 $\pm$ 0.11*                    | 0.67                | 88.88              |
| 21     | PvTRAg33.6  | 5.35  | 0.87 $\pm$ 0.10  | 2.17 $\pm$ 0.20*                    | 1.49 $\pm$ 0.12  | 3.21 $\pm$ 0.42*                    | 1.18 $\pm$ 0.15  | 2.87 $\pm$ 0.25*                    | 0.49 $\pm$ 0.10  | 0.81 $\pm$ 0.15                     | 0.76                | 94.44              |
| 22     | PvTRAg37.4  | 7.88  | 0.76 $\pm$ 0.12  | 2.20 $\pm$ 0.19*                    | 1.08 $\pm$ 0.07  | 2.89 $\pm$ 0.44*                    | 1.02 $\pm$ 0.17  | 3.45 $\pm$ 0.49*                    | 0.32 $\pm$ 0.06  | 0.76 $\pm$ 0.16*                    | 0.72                | 81.48              |
| 23     | PvTRAg34.9  | 6.16  | 0.92 $\pm$ 0.10  | 2.03 $\pm$ 0.16*                    | 1.16 $\pm$ 0.23  | 2.72 $\pm$ 0.50*                    | 0.62 $\pm$ 0.17  | 3.12 $\pm$ 0.37*                    | 0.44 $\pm$ 0.09  | 0.95 $\pm$ 0.17*                    | 0.65                | 64.81              |
| 24     | PvTRAg56.2  | 5.38  | 0.79 $\pm$ 0.11  | 1.68 $\pm$ 0.15*                    | 0.89 $\pm$ 0.11  | 2.25 $\pm$ 0.34*                    | 1.09 $\pm$ 0.13  | 2.40 $\pm$ 0.40*                    | 0.31 $\pm$ 0.07  | 0.53 $\pm$ 0.11                     | 0.7                 | 48.14              |
| 25     | PvTRAg309   | 7.35  | 0.97 $\pm$ 0.09  | 1.9 $\pm$ 0.16*                     | 0.94 $\pm$ 0.13  | 2.50 $\pm$ 0.42*                    | 1.24 $\pm$ 0.21  | 2.81 $\pm$ 0.28*                    | 0.33 $\pm$ 0.05  | 0.97 $\pm$ 0.15*                    | 0.68                | 37.03              |
| 26     | PvTRAg38.5  | 6.63  | 0.69 $\pm$ 0.12  | 1.34 $\pm$ 0.16*                    | 0.74 $\pm$ 0.13  | 3.53 $\pm$ 0.52*                    | 1.19 $\pm$ 0.25  | 2.25 $\pm$ 0.27*                    | 0.53 $\pm$ 0.11  | 1.05 $\pm$ 0.33                     | 0.6                 | 85.18              |
| 27     | PvTRAg39.8a | 7.91  | 0.74 $\pm$ 0.09  | 2.15 $\pm$ 0.24*                    | 1.01 $\pm$ 0.15  | 3.17 $\pm$ 0.52*                    | 1.2 $\pm$ 0.17   | 2.75 $\pm$ 0.34*                    | 0.34 $\pm$ 0.06  | 1.03 $\pm$ 0.21*                    | 0.78                | 59.25              |
| 28     | PvTRAg42.9a | 5.78  | 0.98 $\pm$ 0.08  | 2.05 $\pm$ 0.18*                    | 0.81 $\pm$ 0.11  | 2.61 $\pm$ 0.30*                    | 1.08 $\pm$ 0.18  | 2.12 $\pm$ 0.28*                    | 0.39 $\pm$ 0.07  | 0.96 $\pm$ 0.23*                    | 0.97                | 81.48              |
| 29     | PvTRAg157   | 6.11  | 0.83 $\pm$ 0.11  | 2.17 $\pm$ 0.36*                    | 0.79 $\pm$ 0.13  | 2.64 $\pm$ 0.47*                    | 1.27 $\pm$ 0.22  | 2.78 $\pm$ 0.25*                    | 0.37 $\pm$ 0.06  | 0.77 $\pm$ 0.16*                    | 0.78                | 59.25              |
| 30     | PvTRAg26.3  | 5.33  | 0.89 $\pm$ 0.11  | 2.54 $\pm$ 0.17*                    | 0.62 $\pm$ 0.13  | 2.62 $\pm$ 0.35*                    | 1 $\pm$ 0.18     | 2.55 $\pm$ 0.18*                    | 0.45 $\pm$ 0.07  | 0.69 $\pm$ 0.16                     | 0.97                | 66.66              |
| 31     | PvTRAg73.4  | 6.52  | 0.94 $\pm$ 0.09  | 1.85 $\pm$ 0.28*                    | 0.74 $\pm$ 0.11  | 2.34 $\pm$ 0.26*                    | 1.03 $\pm$ 0.25  | 1.95 $\pm$ 0.25*                    | 0.25 $\pm$ 0.05  | 0.87 $\pm$ 0.16*                    | 0.95                | 38.88              |
| 32     | PvTRAg36.6  | 6.28  | 0.9 $\pm$ 0.10   | 1.78 $\pm$ 0.17*                    | 0.96 $\pm$ 0.13  | 2.89 $\pm$ 0.42*                    | 1.05 $\pm$ 0.19  | 2.17 $\pm$ 0.17*                    | 0.28 $\pm$ 0.04  | 0.47 $\pm$ 0.07                     | 0.82                | 53.7               |
| 33     | PvTRAg36    | 6.01  | 0.81 $\pm$ 0.10  | 2.07 $\pm$ 0.14*                    | 0.8 $\pm$ 0.10   | 2.7 $\pm$ 0.56*                     | 0.95 $\pm$ 0.24  | 2.46 $\pm$ 0.26*                    | 0.26 $\pm$ 0.04  | 0.89 $\pm$ 0.17*                    | 0.89                | 72.22              |
| 34     | PvTRAg99.6  | 5.64  | 0.75 $\pm$ 0.12  | 1.44 $\pm$ 0.21*                    | 0.78 $\pm$ 0.12  | 2.93 $\pm$ 0.35*                    | 0.83 $\pm$ 0.13  | 2.12 $\pm$ 0.32*                    | 0.46 $\pm$ 0.08  | 0.68 $\pm$ 0.13                     | 0.68                | 50                 |
| 35     | PvTRAg34    | 6.13  | 0.84 $\pm$ 0.09  | 2 $\pm$ 0.17*                       | 0.74 $\pm$ 0.14  | 2.09 $\pm$ 0.23*                    | 0.78 $\pm$ 0.14  | 2.42 $\pm$ 0.25*                    | 0.21 $\pm$ 0.03  | 0.55 $\pm$ 0.11*                    | 0.82                | 81.48              |
| 36     | PvTRAg36.7  | 7.45  | 0.76 $\pm$ 0.09  | 2.21 $\pm$ 0.20*                    | 0.86 $\pm$ 0.11  | 2.38 $\pm$ 0.41*                    | 1.11 $\pm$ 0.14  | 2.49 $\pm$ 0.19*                    | 0.22 $\pm$ 0.03  | 0.75 $\pm$ 0.15*                    | 0.89                | 53.7               |

MFI, Mean Fluorescence Index

Values for cytokines are 'mean SEM' percentages of CD3<sup>+</sup>CD4<sup>+</sup> cells.Abbreviations: IL, interleukin; INF, interferon; PvTRAGs, *P. vivax* tryptophan-rich antigens.\*Values that are statistically different ( $P < 0.05$ ) between *P. vivax* exposed and malaria-naive healthy individuals.
